# Supplementary material for: Gratitude in Health Care: A Meta-narrative Review
Source: PubMed Central journal article supplement (PMC7649920; doi:10.1177/1049732320951145), 2020-09-13

Supplementary Figure 1. Overview of process for retrieval, screening and selection of articles for metanarrative review of gratitude in healthcare.

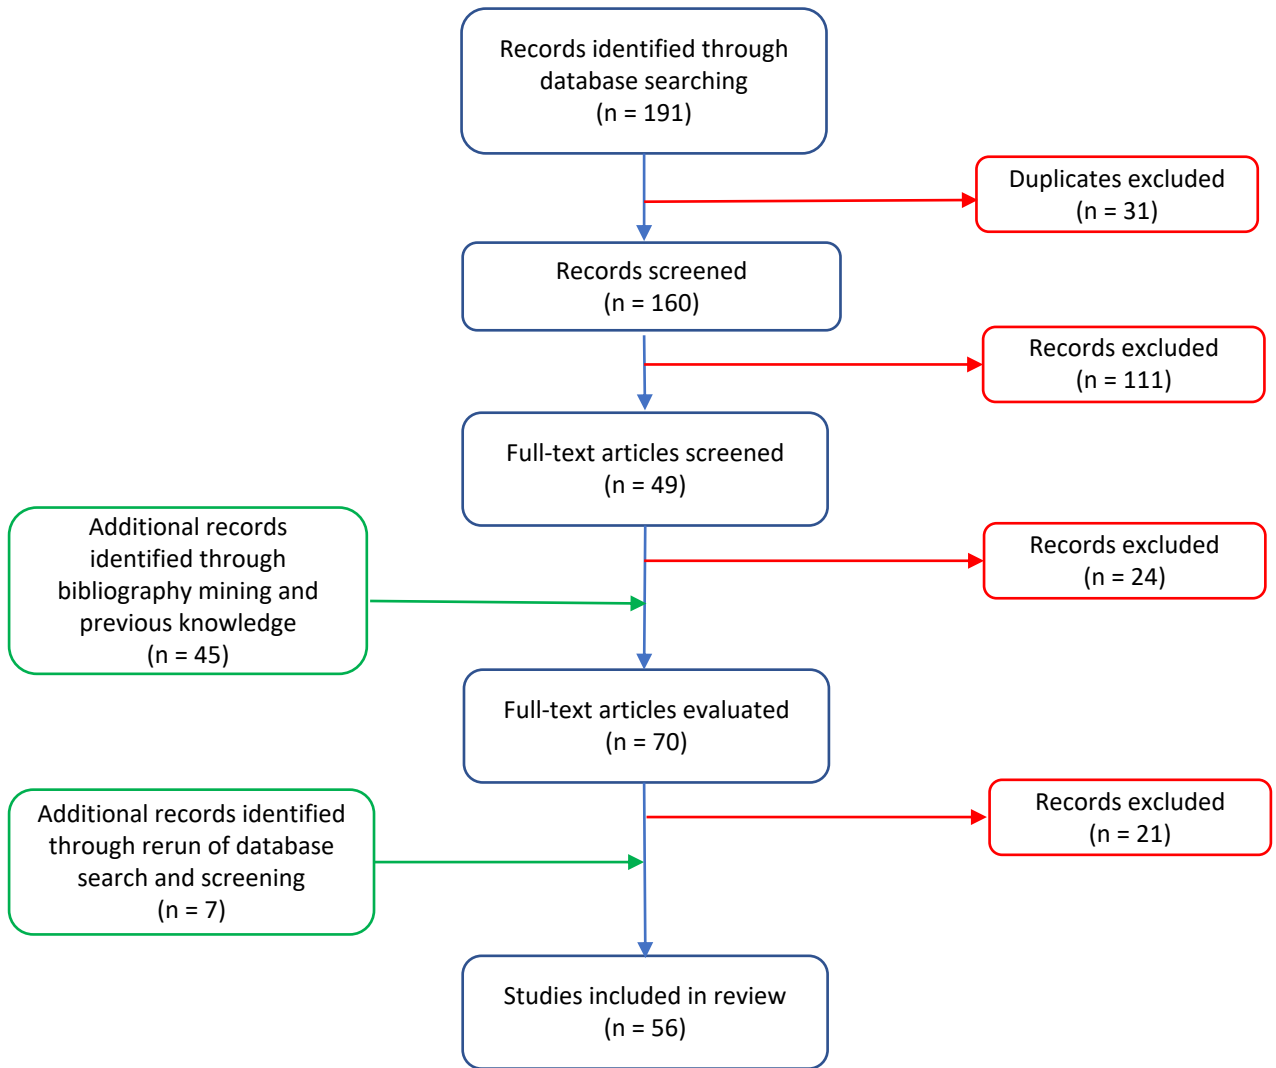

Supplement: Supplementary_figure_1.pdf [file Supplementary_figure_1.pdf]
